# Supplementary material for: Electrochemically induced nucleation of oxidic crystals in melts – a review
Source: Royal Society of Chemistry journal article supplement (doi:10.1039/d1ce00567g), 2021-01-01
Supplement: d1ce00567g1.xlsx [file d1ce00567g1.xlsx]

## Sheet: Experimental Conditions
melt composition [mol%)	melting temp. [°C]	EiN temp. [°C]	cryst. time [min]	reduced element	Voltage E [mV]	Current I [mA]	current density [mA/mm2]	max. growth velocity [µm/s]	Ref.
Phase: Ba/Sr-Fresnoite
2.0 BaO-1.0 TiO2-2 SiO2 +xB2O3 (x=0.75,1,2,3) (aka BTS+xB2O3)	1440	1220	7.5-20	Ti4+	970	10		10	Keding 2000
2.0 BaO-1.0 TiO2-2.75 SiO2 (aka BT0.75S)	1500-1550	1100-1350	4-10	Ti4+	1.2-20000	10-100	0.45-2.7	83.3-166.6	Keding 1996, 1997, 1997b, 1998, Höche 1999, Mayerhöfer 2001, Keding 2005, Wisniewski 2010, 2010b,2015, Nagel 2011, Martin 2021 PhD thesis: Keding+Nagel+Wisniewski
2.0 SrO-1.0 TiO2-2.75 SiO2 (aka ST0.75S)	1500	1200	30	Ti4+	1200	30		11	Keding 2004
2.0 BaO-1.0 TiO2-3.1 SiO2 (aka BT1.1S)	1500	1200		Ti4+	1200	50			Mayerhöfer 2001
Phase: Mullite (ca. Al4.65Al1.24Ti0.11O9.675)
56.1 SiO2-20.9 Al2O3-15.7 MgO-7.3 TiO2 + 0.03 Fe2O3	1530-1550	1340 - 1500	10 - 15	Ti4+	1500 - 5000				Gönna 1999
52.6 SiO2-18.7 Al2O3-14.3 MgO-7.7 TiO2-4.7 Fe2O3-2.0 CaO	1510 - 1520	1200 - 1400	up to 36	Ti4+		0.5-5	0.45	4.2	Carl 2007, 2008, 2010, Wisniewski 2011, 2014, Carl PhD Thesis
67.2 SiO2-19.2 Al2O3-14.8 MgO-8.3 TiO2		1420		Ti4+		100			Keding 1998
Phase: Lithium Niobate (LiNbO3)
45 Li2O-20 Nb2O3-35 SiO2	1200-1250	1000		Nb4+		50			Gerth 1999, PhD Keding 1997
Li2O- Nb2O3-0.75 SiO2	1000	1000		Nb4+		20			Keding 1998
Phase: Fluorichterite + Diopside
8.3 Na2O-26.8 MgO-10.9 CaO-51.2 SiO2-2.8 MgF2 + 0.01 Fe2O3	1500	1200	45	Si4+	800 - 1000	1-10		13.3	Keding 2001
Phase: Lithium Disilicate (Li2Si2O5)
Li2Si2O5	1400	629-1033		Si4+		5	0.032	95	PhD Anspach 2005, Anspach 2005
90 Li2Si2O5-10 BaSiO3	1400			Si4+				40	PhD Anspach 2005
90 Li2Si2O5-10 BaSi2O5	1400	629-1033		Si4+	700-2400	0.05-10	0.004-0.675	34	PhD Anspach 2005, Anspach 2005
90 Li2Si2O5-10 BaSi3O7	1400			Si4+		5		35	PhD Anspach 2005
90 Li2Si2O5-10 BaSi4O9	1400			Si4+		5		18	PhD Anspach 2005
97 Li2Si2O5-3 BaSi2O5	1400			Si4+		5		36	PhD Anspach 2005
97 Li2Si2O5-3 La2O3	1400			Si4+		5		46	PhD Anspach 2005
99 Li2Si2O5- MoO3	1400			Si4+,Mo5+		5		50	PhD Anspach 2005
Phase: Sr-phosphate (Sr(PO3)2)
NaPO3-2 Sr(PO3)2	780-1100	780	15	P5+		20-30			PhD Keding 1997, Keding 1998
